# Supplementary material for: Supplements and Nutritional Interventions to Augment High-Intensity Interval Training Physiological and Performance Adaptations—A Narrative Review
Source: PubMed Central journal article supplement (PMC7071320; doi:10.3390/nu12020390), 2020-01-31
Supplement: nutrients-12-00390-s001.pdf [file nutrients-12-00390-s001.pdf]

**Table S1:** Research to date involving the delivery of dietary inorganic nitrate supplementation and high-intensity, aerobic-type exercise.

| Study                   | Participants                                             | Exercise                                                                                                      | Timing of Supplementation | Supplementation                                                                    | Results                                                                                   |
|-------------------------|----------------------------------------------------------|---------------------------------------------------------------------------------------------------------------|---------------------------|------------------------------------------------------------------------------------|-------------------------------------------------------------------------------------------|
| <b>Repeat Sprints</b>   |                                                          |                                                                                                               |                           |                                                                                    |                                                                                           |
| Kent et al. 2018        | Trained, team-sport athletes (male; n=12)                | Cycling, repeat sprints (9 x 4s) at sea level or 3000 meter simulated altitude                                | 120 min prior to exercise | 13.0 mmol NO <sub>3</sub> <sup>-</sup> delivered as beet root juice                | No effect on peak or mean power output; reduced V <sub>O2</sub> during submaximal warm-up |
| Muggeridge et al. 2017  | Trained male kayakers (male; n=8)                        | Kayak ergometer repeat sprints 5 x 10 sec, 50 sec of rest                                                     | 180 min prior to exercise | 5.0 mmol NO <sub>3</sub> <sup>-</sup> delivered as beet root juice                 | Increase average power output                                                             |
| Aucouturier et al. 2015 | Recreationally trained, team sport players (male; n=12)  | Cycle ergometer repeat 15 sec sprints with 30 sec rest until exhaustion; 170% of maximum aerobic capacity     | 180 min prior to exercise | 10.9 mmol NO <sub>3</sub> <sup>-</sup> delivered as beet root juice                | Increase repetitions and total workload                                                   |
| Buck et al. 2015        | Amateur, team sport players (female, n=13)               | 6 x 20 meter, repeated sprints performed 3 times (start, half-time, and end) of a simulated team game circuit | 3 hours prior to exercise | 6.0 mmol NO <sub>3</sub> <sup>-</sup> delivered as beet root juice (placebo added) | No improvements in total sprint times                                                     |
| Thompson et al. 2017    | Recreationally trained, team sports players (male; n=16) | 2 sets of cycle ergometer sprints; 5 sets of 6 sec sprints with 14 sec rest ; occurred MID and POST-          | 7 days                    | 12.8 mmol NO <sub>3</sub> <sup>-</sup> delivered as beet root juice                | Work volume increase at MID & work volume increase at POST;                               |

|                      |                                                         |                                                                                                                                                                                             |                           |                                                                     |                                                                                |
|----------------------|---------------------------------------------------------|---------------------------------------------------------------------------------------------------------------------------------------------------------------------------------------------|---------------------------|---------------------------------------------------------------------|--------------------------------------------------------------------------------|
|                      |                                                         | simulated team-sport matches                                                                                                                                                                |                           |                                                                     | increase in work volume for entire session                                     |
| Clifford et al. 2016 | Competition trained, team sport players (male, n=20)    | 2 sets of RST; 20 x 30 m sprints w/ 30 sec rest                                                                                                                                             | 150 min prior             | 11.4 mmol NO <sub>3</sub> <sup>-</sup> delivered as beet root juice | No effect on mean or average sprint times                                      |
| Martin et al. 2014   | Recreationally-trained, team sport players (male; n=16) | Cycle ergometer repeat 8 sec sprints with 30 sec rest until exhaustion                                                                                                                      | 120 min prior to exercise | 6.4 mmol NO <sub>3</sub> <sup>-</sup> delivered as beet root juice  | Decreased total number of repetitions and decreased total work                 |
| Wylie et al. 2013    | Recreationally trained, team sport players (male, n=10) | Cycle ergometer, repeat sprints;<br>1:4 ratio<br>24 x [6 sec sprint; 24 sec rest]<br><br>1:8 ratio<br>7 x [30 sec sprint; 4 min rest]<br><br>1:1 ratio<br>6 x [60 sec sprint x 60 sec rest] | 5 days                    | 8.4 mmol NO <sub>3</sub> <sup>-</sup> delivered as beet root juice  | Improved mean average power and improved mean peak power for 1:4 ratio sprints |
